# Supplementary material
Source: PubMed Central journal article supplement (PMC5653256)

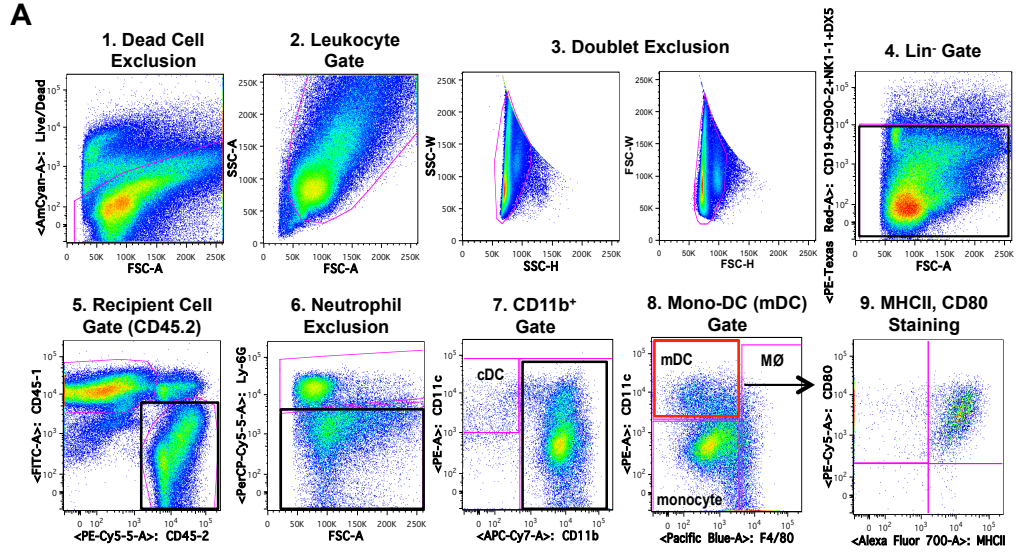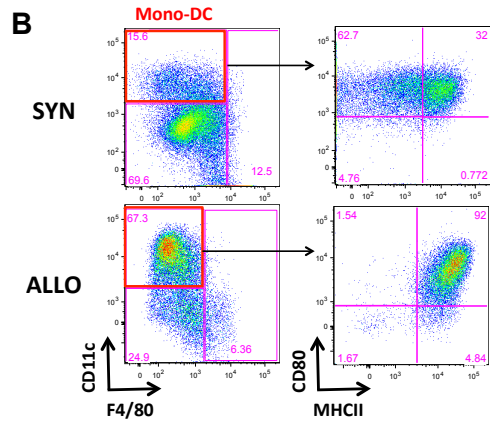

Fig. S1

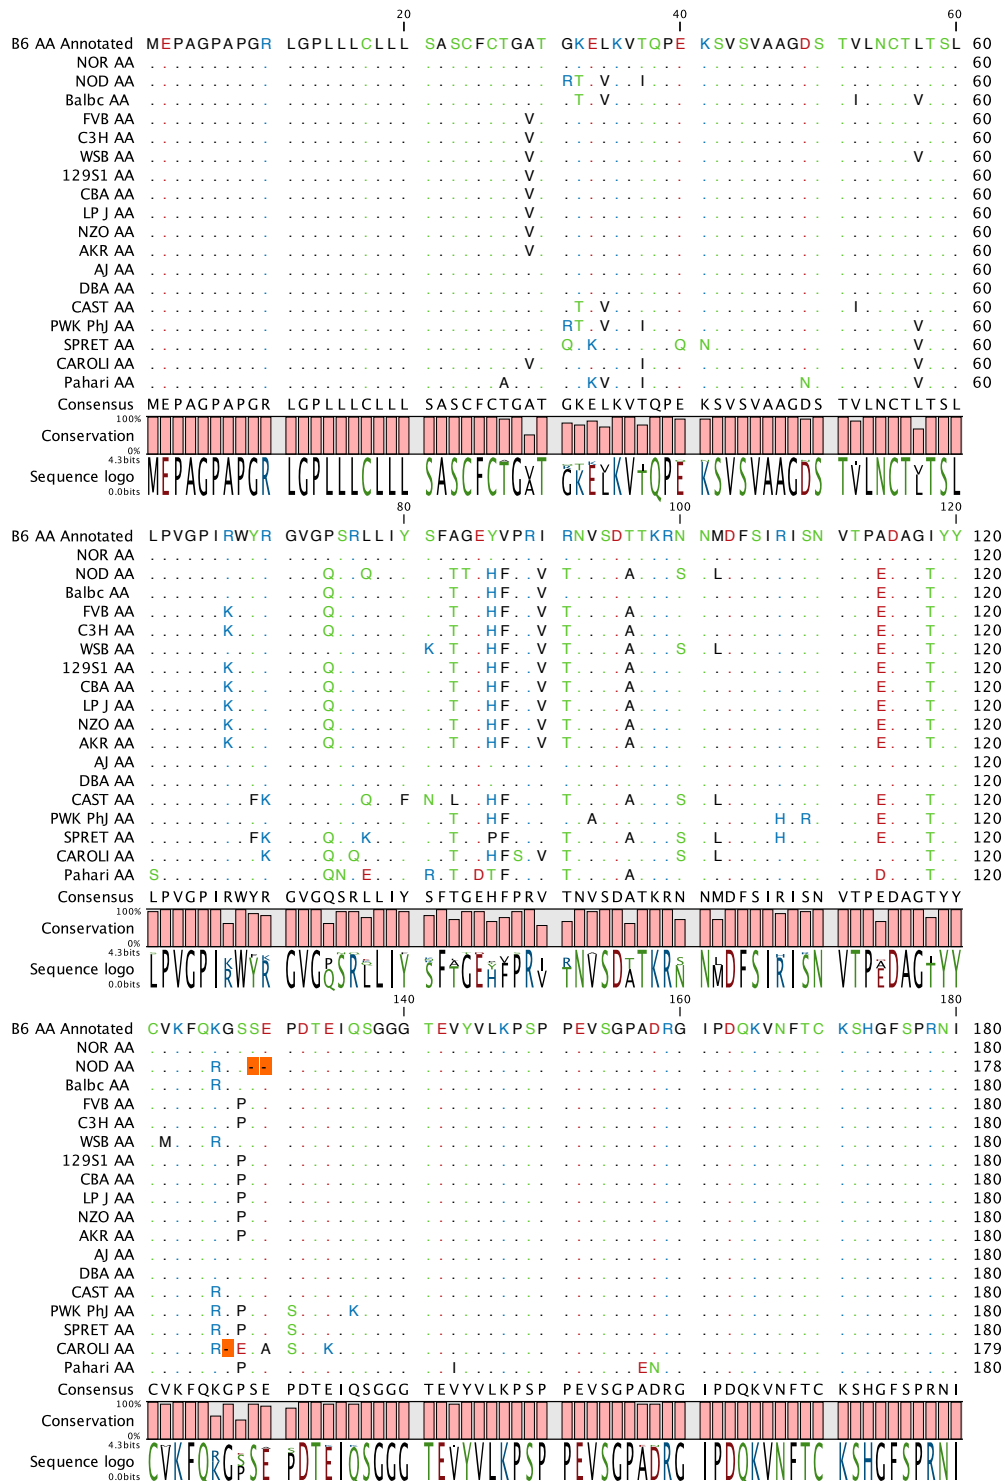

Fig. S2

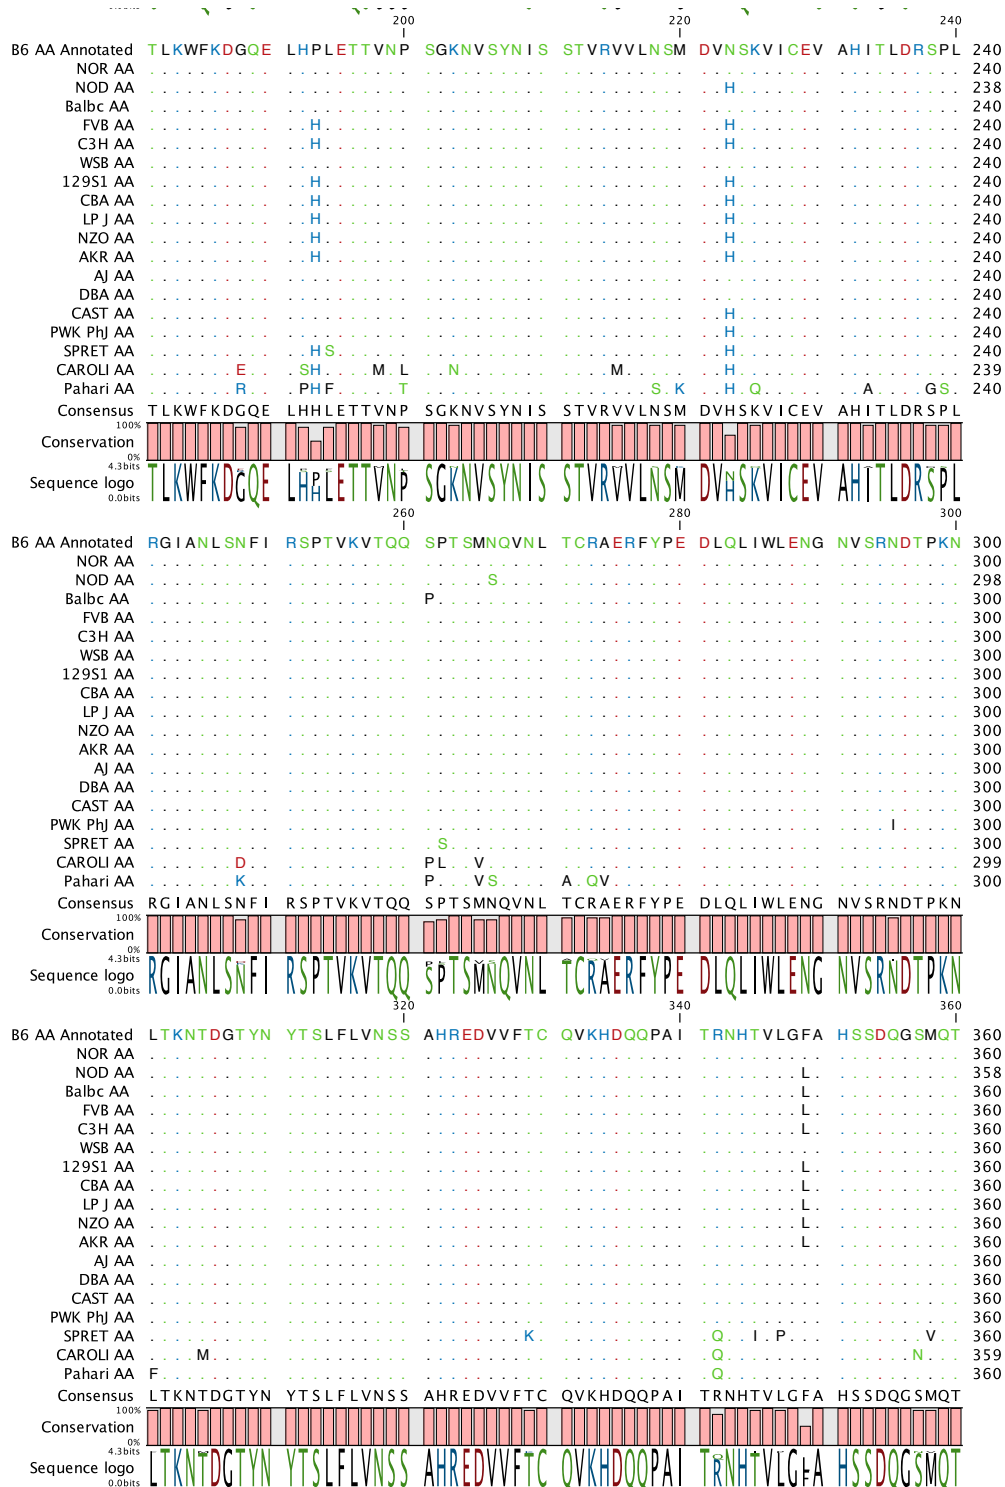

Fig. S2 continued

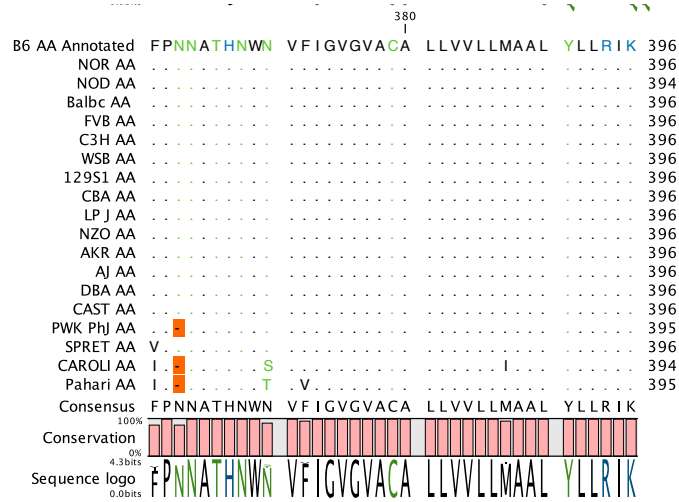

Fig. S2 continued

Supplement: NIHMS879539-supplement-supplemental_figures.pdf [file NIHMS879539-supplement-supplemental_figures.pdf]
